# Supplementary material for: Hydrologic implications of projected changes in rain-on-snow melt for Great Lakes Basin watersheds
Source: Copernicus journal article supplement (doi:10.5194/hess-27-1755-2023), 2023-05-04
Supplement: Supplementary file 1 [file hess-27-1755-2023-supplement.pdf]

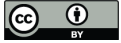

*Supplement of*

## **Hydrologic implications of projected changes in rain-on-snow melt for Great Lakes Basin watersheds**

**Daniel T. Myers et al.**

*Correspondence to:* Daniel T. Myers ([danmyers901@gmail.com](mailto:danmyers901@gmail.com))

The copyright of individual parts of the supplement might differ from the article licence.

**Table S1.** Modeling center and institution names. Adapted from Coupled Model Intercomparison Project Phase 5 (CMIP5) Model Groups and their Terms of Use (<https://pcmdi.llnl.gov/mips/cmip5/availability.html>)

| Center                       | Model                        | Institution                                                                                                                                                               |
|------------------------------|------------------------------|---------------------------------------------------------------------------------------------------------------------------------------------------------------------------|
| <a href="#">CSIRO-BOM</a>    | ACCESS1.0                    | CSIRO (Commonwealth Scientific and Industrial Research Organisation), and BOM (Bureau of Meteorology), Australia                                                          |
| BCC                          | BCC-CSM1.1                   | Beijing Climate Center, China Meteorological Admin.                                                                                                                       |
| CCCma                        | CanESM2                      | Canadian Centre for Climate Modelling and Analysis                                                                                                                        |
| NCAR                         | CCSM4                        | National Center for Atmospheric Research                                                                                                                                  |
| NSF-DOE-NCAR                 | CESM1(BGC)                   | National Science Foundation, Department of Energy, National Center for Atmospheric Research                                                                               |
| <a href="#">CNRM-CERFACS</a> | CNRM-CM5                     | Centre National de Recherches Meteorologiques / Centre Europeen de Recherche et Formation Avancees en Calcul Scientifique                                                 |
| <a href="#">CSIRO-QCCCE</a>  | CSIRO-Mk3.6.0                | Commonwealth Scientific and Industrial Research Organisation, Queensland Climate Change Centre of Excellence                                                              |
| <a href="#">NOAA GFDL</a>    | GFDL-ESM2G<br>GFDL-ESM2M     | Geophysical Fluid Dynamics Laboratory                                                                                                                                     |
| INM                          | INM-CM4                      | Institute for Numerical Mathematics                                                                                                                                       |
| <a href="#">IPSL</a>         | IPSL-CM5A-LR<br>IPSL-CM5A-MR | Institut Pierre-Simon Laplace                                                                                                                                             |
| MIROC                        | MIROC5                       | Atmosphere and Ocean Research Institute (The University of Tokyo), National Institute for Environmental Studies, and Japan Agency for Marine-Earth Science and Technology |
| MIROC                        | MIROC-ESM<br>MIROC-ESM-CHEM  | Japan Agency for Marine-Earth Science and Technology, Atmosphere and Ocean Research Institute (The University of Tokyo), and National Institute for Environmental Studies |
| MPI-M                        | MPI-ESM-LR<br>MPI-ESM-MR     | Max Planck Institute for Meteorology (MPI-M)                                                                                                                              |
| MRI                          | MRI-CGCM3                    | Meteorological Research Institute                                                                                                                                         |
| NCC                          | NorESM1-M                    | Norwegian Climate Centre                                                                                                                                                  |

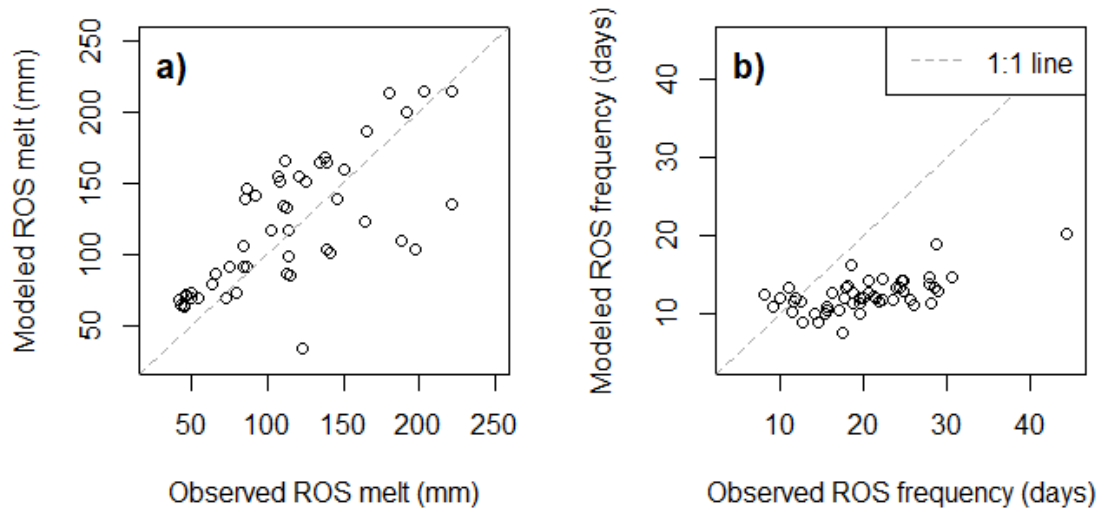

**Figure S1.** For the 50 gridded climate and snowpack evaluation points in the Great Lakes Basin: a) comparison of historic (1960-1999) mean annual ROS melt amounts calculated for observed data with those modeled by our ensemble of climate projections, and b) the same comparison for the mean annual frequency of ROS events.
